# Supplementary material for: Evaluation of an Affibody-Based Binder for Imaging of Immune Check-Point Molecule B7-H3
Source: MDPI journal article supplement (doi:10.3390/pharmaceutics14091780), 2022-08-25
Supplement: s1 [file s1]

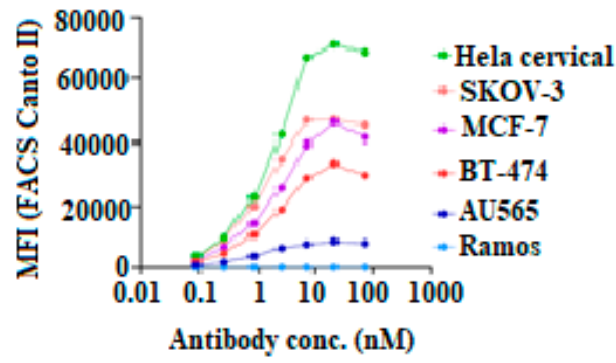

Figure S1. B7-H3 expression on different cell lines.

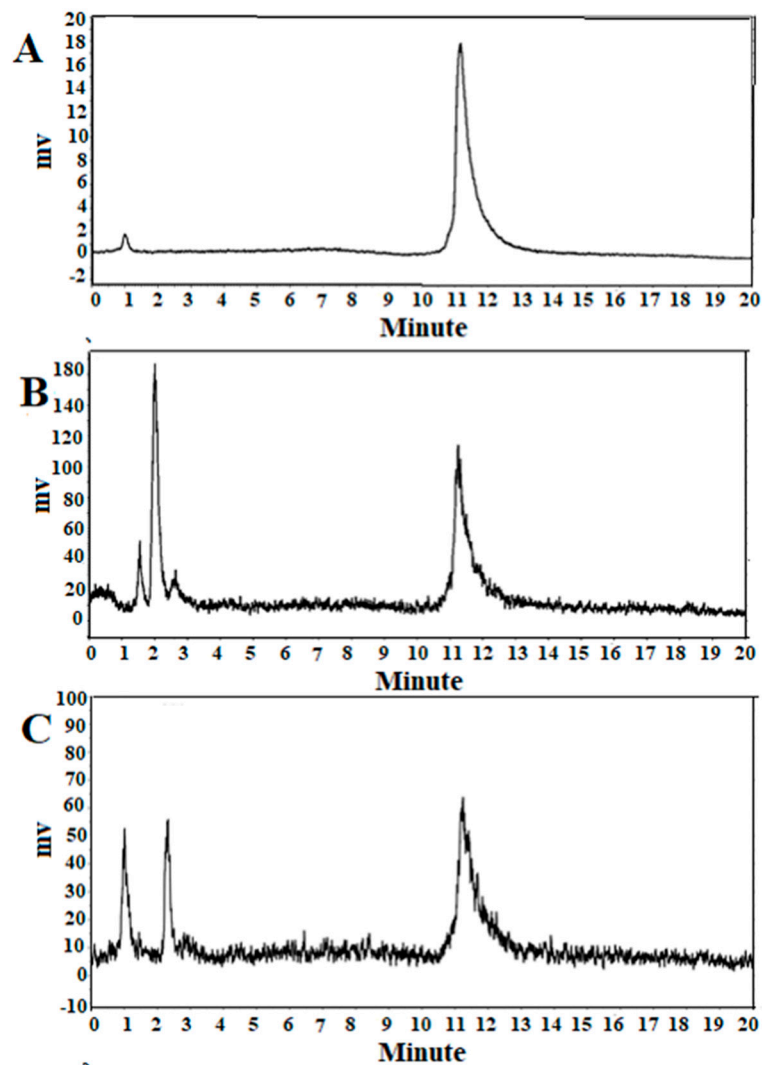

Figure S2. A. Radiochromatogram of [ $^{99m}\text{Tc}$ ]Tc-AC12-GGGC before injection in mice; B and C. Radiochromatograms of urine collected from mice 30 min after injection.
